# Supplementary material
Source: PubMed Central journal article supplement (PMC2761089)
Supplement: NIHMS138797-supplement-supp.pdf [file NIHMS138797-supplement-supp.pdf]

## Supplementary Data

Table 1. H1.4 Phosphorylation<sup>a</sup>

| H1.4 Isoform | No Treatment | 48hr Dex    | 10uM CVT313 | 25uM CVT313 | 2.5uM CGP74514 |
|--------------|--------------|-------------|-------------|-------------|----------------|
| 0 PO4        | 39% (0.040)  | 83% (0.041) | 85% (0.052) | 36% (0.050) | 76% (0.048)    |
| 1 PO4        | 34% (0.029)  | 11% (0.041) | 15% (0.052) | 4% (0.050)  | 19% (0.024)    |
| 2 PO4        | 18% (0.026)  |             |             |             | 4% (0.027)     |
| 3 PO4        | 8% (0.022)   |             |             |             |                |

<sup>a</sup> Relative Percentage of Each Isoform with standard deviation in parenthesis ( $n \geq 6$ ).

Table 2. H1.2 Phosphorylation<sup>a</sup>

| H1.2 Isoform | No Treatment | 48hr Dex    | 10uM CVT313 | 25uM CVT313 | 2.5uM CGP74514 |
|--------------|--------------|-------------|-------------|-------------|----------------|
| 0 PO4        | 58% (0.070)  | 85% (0.048) | 84% (0.070) | 93% (0.059) | 80% (0.038)    |
| 1 PO4        | 34% (0.033)  | 15% (0.048) | 16% (0.070) | 8% (0.059)  | 20% (0.038)    |
| 2 PO4        | 8% (0.054)   |             |             |             |                |

<sup>a</sup> Relative Percentage of Each Isoform with standard deviation in parenthesis ( $n \geq 6$ ).

Table 3. Total H1.2 and H1.4 Phosphorylation<sup>a</sup>

| Histone        | No Treatment | 48hr Dex | 10uM CVT313 | 25uM CVT313 | 2.5uM CGP74514 |
|----------------|--------------|----------|-------------|-------------|----------------|
| Total H1.4 PO4 | 60%          | 11%      | 15%         | 4%          | 23%            |
| Total H1.2 PO4 | 42%          | 15%      | 16%         | 8%          | 20%            |

<sup>a</sup> Total percentage of phosphorylated isoforms ( $n \geq 6$ ).

Table 4. Ratio of Phosphorylated Isoforms to Total Isoforms and Normalized to No Treatment<sup>a</sup>

| Histone        | No Treatment | 48hr Dex | 10uM CVT313 | 25uM CVT313 | 2.5uM CGP74514 |
|----------------|--------------|----------|-------------|-------------|----------------|
| Total H1.4 PO4 | 1            | 0.18     | 0.25        | 0.07        | 0.38           |
| Total H1.2 PO4 | 1            | 0.36     | 0.38        | 0.19        | 0.48           |

<sup>a</sup> Ratio of phosphorylated isoforms/total isoforms and normalized to 1 for no treatment ( $n \geq 6$ ).
